# Supplementary material for: Ligand- and Structure-Based Virtual Screening Identifies New Inhibitors of the Interaction of the SARS-CoV-2 Spike Protein with the ACE2 Host Receptor
Source: MDPI journal article supplement (doi:10.3390/pharmaceutics16050613), 2024-05-01
Supplement: s1 [file s1]

## Supplementary Materials

The supplementary material corresponds to the *in silico* studies.

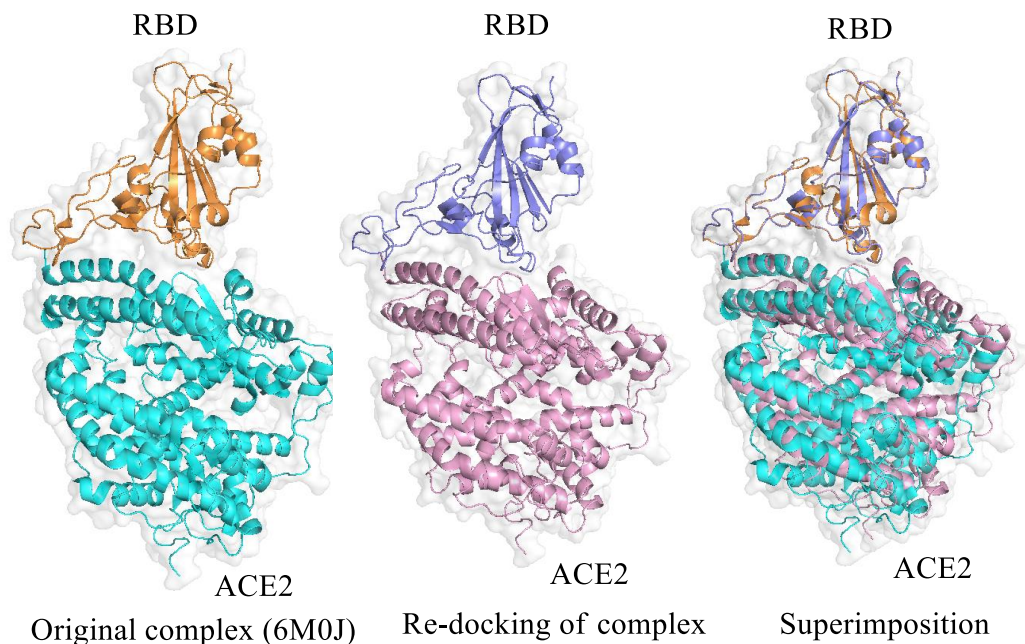

Figure S1. Comparison of protein-protein complex between RBD and ACE2 (re-docking versus original).

Table S3. List of top 20 ligands with best vina score recovered from Mol-Port.

| Number | Mol-Port ID         | Internal code                                 | Vina score (kcal/mol) | Availability | Amount/Price     |
|--------|---------------------|-----------------------------------------------|-----------------------|--------------|------------------|
| 1      | MolPort-003-009-429 | DRI-C24041_MP_SIM_50_U_19_out.pdbqt           | -8.7                  | In stock     | 10 mg/99.00 USD  |
| 2      | MolPort-000-656-930 | DRI-C24041_MP_SIM_50_U_14_out.pdbqt           | -8.4                  | In stock     | 10 mg/275.00 USD |
| 3      | MolPort-006-110-902 | DRI-C24041_MP_SIM_50_U_25_out.pdbqt           | -8                    | In stock     | 1 g/6.00 USD     |
| 4      | MolPort-001-025-507 | DRI-C24041_MP_SIM_50_U_88_out.pdbqt           | -8                    | In stock     | 10 mg/134.01 USD |
| 5      | MolPort-019-334-419 | DRI-C24041_MP_SIM_50_U_5_corregido_out.pdbqt  | -7.9                  | In stock     | 1 g/10.00 USD    |
| 6      | MolPort-002-826-402 | DRI-C24041_MP_SIM_50_U_2_out.pdbqt            | -7.8                  | In stock     | 10 mg/22.80 USD  |
| 7      | MolPort-000-643-953 | DRI-C24041_MP_SIM_50_U_69_out.pdbqt           | -7.7                  | In stock     | 10 mg/399.00 USD |
| 8      | MolPort-000-643-952 | DRI-C24041_MP_SIM_50_U_70_out.pdbqt           | -7.6                  | In stock     | 5 mg/87.77 USD   |
| 9      | MolPort-001-551-049 | DRI-C24041_MP_SIM_50_U_73_out.pdbqt           | -7.6                  | In stock     | 10 mg/399.00 USD |
| 10     | MolPort-044-193-346 | DRI-C24041_MP_SIM_50_U_31_corregido_out.pdbqt | -7.5                  | In stock     | 5 mg/133.10 USD  |

|    |                     |                                     |      |              |                 |
|----|---------------------|-------------------------------------|------|--------------|-----------------|
| 11 | MolPort-002-363-768 | DRI-C24041_MP_SIM_50_U_80_out.pdbqt | -7.5 | In stock     | 10 mg/22.80 USD |
| 12 | MolPort-003-134-901 | DRI-C24041_MP_SIM_50_U_38_out.pdbqt | -7.3 | In stock     | 10 mg/99.00 USD |
| 13 | MolPort-001-525-676 | DRI-C24041_MP_SIM_50_U_47_out.pdbqt | -7.3 | In stock     | 10 mg/22.80 USD |
| 14 | MolPort-028-745-491 | DRI-C24041_MP_SIM_50_U_48_out.pdbqt | -7.3 | Discontinued | -               |
| 15 | MolPort-002-363-202 | DRI-C24041_MP_SIM_50_U_65_out.pdbqt | -7.3 | In stock     | 10 mg/22.80 USD |
| 16 | MolPort-002-840-110 | DRI-C24041_MP_SIM_50_U_75_out.pdbqt | -7.3 | In stock     | 10 mg/61.25 USD |
| 17 | MolPort-001-024-768 | DRI-C24041_MP_SIM_50_U_10_out.pdbqt | -7.2 | In stock     | 10 mg/61.25 USD |
| 18 | MolPort-000-652-164 | DRI-C24041_MP_SIM_50_U_40_out.pdbqt | -7.2 | In stock     | 10 mg/99.00 USD |
| 19 | MolPort-003-821-153 | DRI-C24041_MP_SIM_50_U_8_out.pdbqt  | -7.2 | In stock     | 10 mg/22.80 USD |
| 20 | MolPort-002-827-725 | DRI-C24041_MP_SIM_50_U_34_out.pdbqt | -7.1 | In stock     | 10 mg/22.80 USD |

Table S4. List of top 20 ligands with best vina score recovered from PubChem.

| Number | PubChem ID | Internal code                     | Vina score (kcal/mol) | Availability               | Amount/Price        |
|--------|------------|-----------------------------------|-----------------------|----------------------------|---------------------|
| 1      | 16678941   | DRI-C24041_PC_SIM50_380_out.pdbqt | -8.9                  | In stock                   | 10 mg/379.50 USD    |
| 2      | 8532       | DRI-C24041_PC_SIM50_486_out.pdbqt | -8.4                  | In stock                   | 10 mg/399.00 USD    |
| 3      | 9829523    | DRI-C24041_PC_SIM50_201_out.pdbqt | -8.3                  | In stock                   | 10 mg/568.00 USD    |
| 4      | 60838      | DRI-C24041_PC_SIM50_79_out.pdbqt  | -8.3                  | In stock                   | 25 mg/80.00 USD     |
| 5      | 54680676   | DRI-C24041_PC_SIM50_4_out.pdbqt   | -8                    | In stock                   | 50 mg/562.00 USD    |
| 6      | 54676884   | DRI-C24041_PC_SIM50_179_out.pdbqt | -7.9                  | In stock                   | 25 mg/134.70 USD    |
| 7      | 34231      | DRI-C24041_PC_SIM50_271_out.pdbqt | -7.8                  | In stock                   | 250 mg/12.82.00 USD |
| 8      | 110635     | DRI-C24041_PC_SIM50_231_out.pdbqt | -7.7                  | In stock                   | 50 mg/266.00 USD    |
| 9      | 54698175   | DRI-C24041_PC_SIM50_367_out.pdbqt | -7.7                  | not available for purchase | -                   |
| 10     | 45138674   | DRI-C24041_PC_SIM50_374_out.pdbqt | -7.7                  | In stock                   | 1 mg/104.50 USD     |
| 11     | 62330      | DRI-C24041_PC_SIM50_433_out.pdbqt | -7.7                  | In stock                   | 10 mg/399.00 USD    |
| 12     | 31416      | DRI-C24041_PC_SIM50_452_out.pdbqt | -7.7                  | In stock                   | 1 mg/80.45 USD      |
| 13     | 135449332  | DRI-C24041_PC_SIM50_173_out.pdbqt | -7.6                  | In stock                   | 10 mg/167.20 USD    |
| 14     | 6918296    | DRI-C24041_PC_SIM50_203_out.pdbqt | -7.6                  | In stock                   | 10 mg/185.90 USD    |
| 15     | 5488548    | DRI-C24041_PC_SIM50_205_out.pdbqt | -7.6                  | In stock                   | 10 mg/298.00 USD    |
| 16     | 444031     | DRI-C24041_PC_SIM50_410_out.pdbqt | -7.6                  | In stock                   | 100 mg/300.00 USD   |
| 17     | 6918554    | DRI-C24041_PC_SIM50_202_out.pdbqt | -7.5                  | In stock                   | 10 mg/30.00 USD     |
| 18     | 3002335    | DRI-C24041_PC_SIM50_217_out.pdbqt | -7.5                  | In stock                   | 1 g/332.00 USD      |
| 19     | 20804      | DRI-C24041_PC_SIM50_280_out.pdbqt | -7.5                  | In stock                   | 5 g/30.00 USD       |
| 20     | 5717       | DRI-C24041_PC_SIM50_314_out.pdbqt | -7.5                  | In stock                   | 10 mg/76.00 USD     |
| 21     | 163233165  | DRI-C24041_Control_out.pdbqt      | -7.5                  | -                          | -                   |

PPI in presence of **DRI-1**

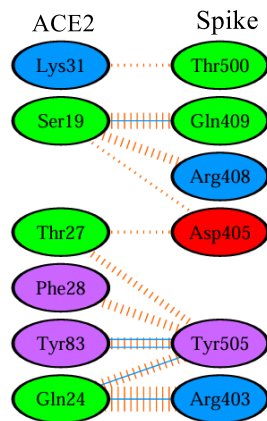

PPI in presence of **DRI-2**

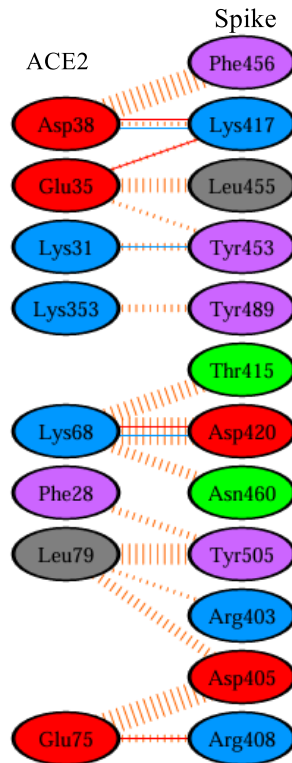

PPI in presence of **DRI-3**

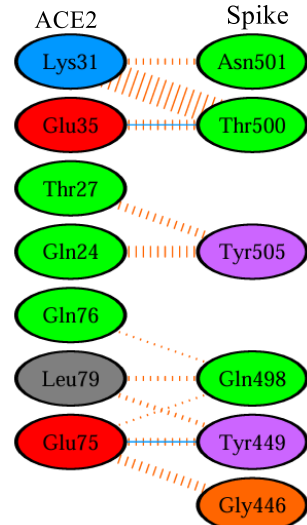

PPI in presence of **DRI-4**

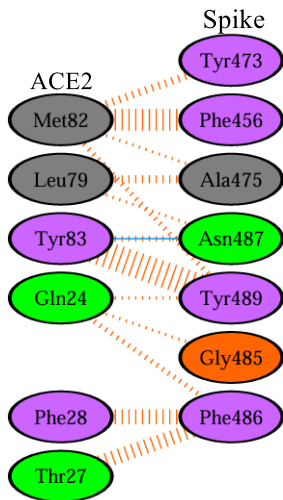

PPI in presence of **DRI-5**

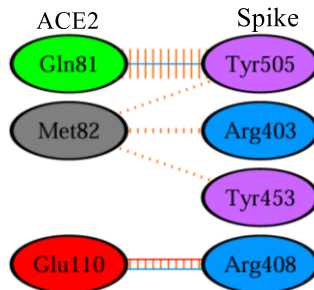

PPI in presence of **DRI**

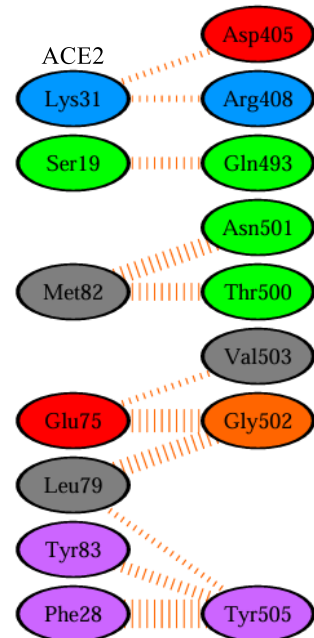

Figure S2. Interaction between RBD and ACE2 in presence of potential protein-protein inhibitors (PPI). Salt bridges are shown as red lines, yellow lines represent disulfide bonds, Hydrogen bonds are illustrated as sky-blue color and orange lines mean non-bonded contacts. Residue colours: Positive (His, Lys, and Arg); negative (Asp, Glu); Ser, Thr, Asn, Gln = neutral; Ala, Val, Leu, Ile, Met = aliphatic; Phe, Tyr, Trp = aromatic; P, G = Pro, Gly; C = cysteine.

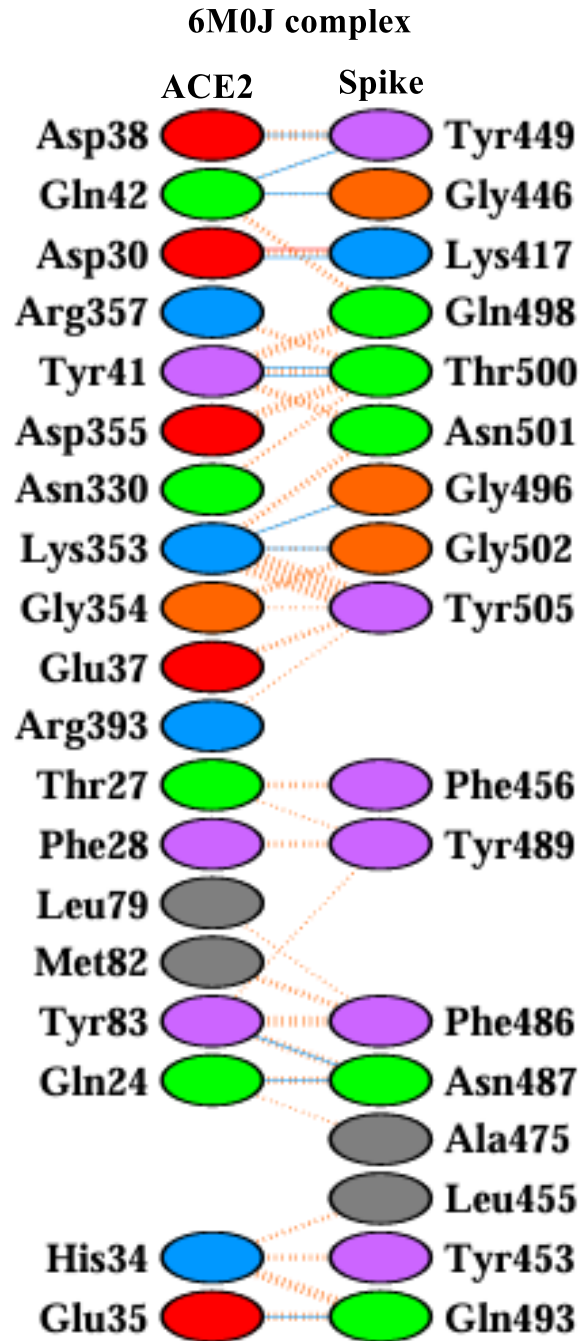

Figure S3. Protein-protein interaction profile of the original crystal (PDB ID: 6M0J). Salt bridges are shown as red lines, yellow lines represent disulfide bonds, Hydrogen bonds are illustrated as sky-blue color and orange lines mean non-bonded contacts. Residue colours:

Positive (His, Lys, and Arg); negative (Asp, Glu); Ser, Thr, Asn, Gln = neutral; Ala, Val, Leu, Ile, Met = aliphatic; Phe, Tyr, Trp = aromatic; P, G = Pro, Gly; C = cysteine.
